# Supplementary material for: Cis-regulatory landscapes of four cell types of the retina
Source: Oxford University Press journal article supplement (doi:10.1093/nar/gkx923), 2017-10-02
Supplement: gkx923_supp.zip [file gkx923_supp.zip]

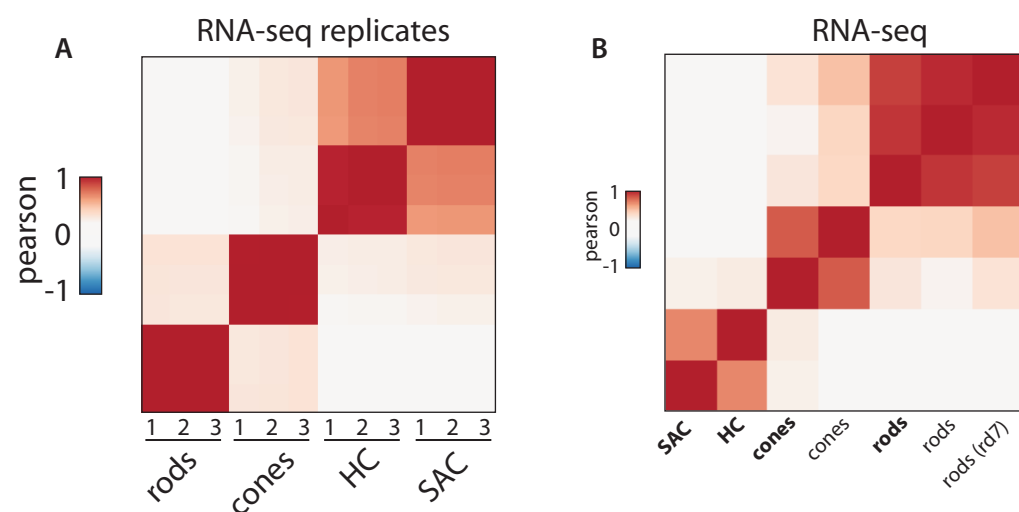

Supplementary figure 1:

(A) Reproducibility of cell isolation as measured by RNA-seq. Correlation heatmap comparing RNA-seq signal for biological replicates. Pearson correlation for genic RNA-seq signal for samples issued from independent cell sorts for each cell type studied.

(B) Comparison of the generated expression profiles with photo-receptors sorted by INTACT nuclei-purification procedure. Correlation heatmap comparing RNA-seq signal obtained in this study using whole cell purification (bold labels) with previously generated nuclear RNA-seq datasets for the same cell types (Mo et al, 2016) (normal labels).

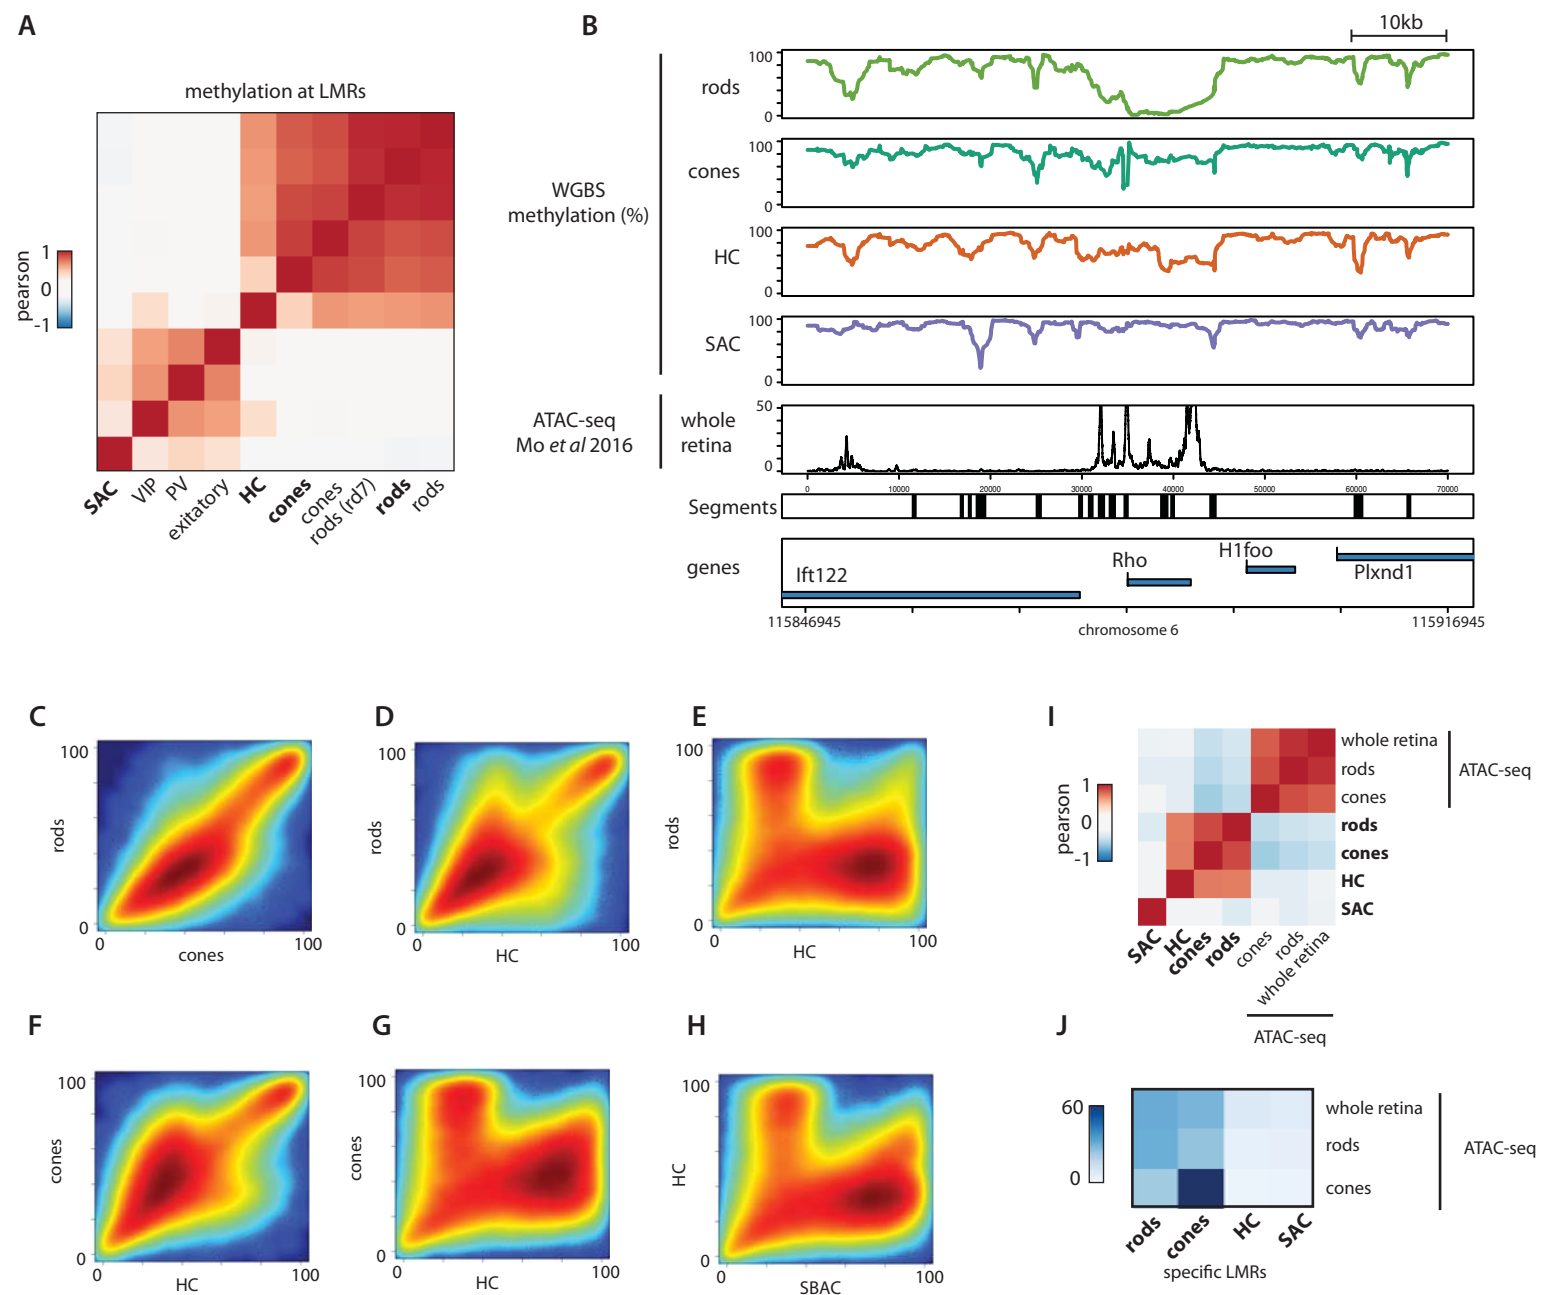

Supplementary figure 2:

(A) Comparison of the generated WGBS data with datasets previously generated by INTACT-nuclei purification procedure. Correlation heatmap comparing single CpG methylation levels at LMRs (bold labels) with previously generated datasets for retinal and neuronal cell types (Mo et al, 2015, 2016) (normal labels).

(B) Rod specific hypo-methylation is observed at the Rhodopsin gene locus. Shown is the average smoothed methylation for the indicated cell types over a 70 kb chromosomal region around the rod specific Rhodopsin gene. Read counts for accessibility measure of total retinas (ATAC-seq) is shown as smoothed signal. Black boxes denote regions having low methylation in at least one of the analyzed cell types, representing putative retinal CREs. (C-H) Variation of DNA methylation levels at LMRs across the four retina cell types. Pairwise smoothed scatter plots representing average methylation levels for LMRs in the corresponding cell types. (I) Quantitative comparison of methylation levels at LMRs with chromatin accessibility as measured by ATAC-seq. Correlation heatmap comparing average methylation levels at LMRs (bold labels) with previously generated ATAC-seq datasets in whole-retina and isolated photoreceptors (Mo et al, 2016) (normal labels). (J) Overlap between cell type-specific LMRs identified in isolated cell types with accessibility in whole-retina and photoreceptors. Heatmap depicting the percentage overlap between LMRs detected in isolated cell types (x axis) and ATAC-seq signal in whole retina or isolated photoreceptors ( $\log_2(\text{RPKM}) > 0.5$ ) (y axis) (Mo et al, 2016).

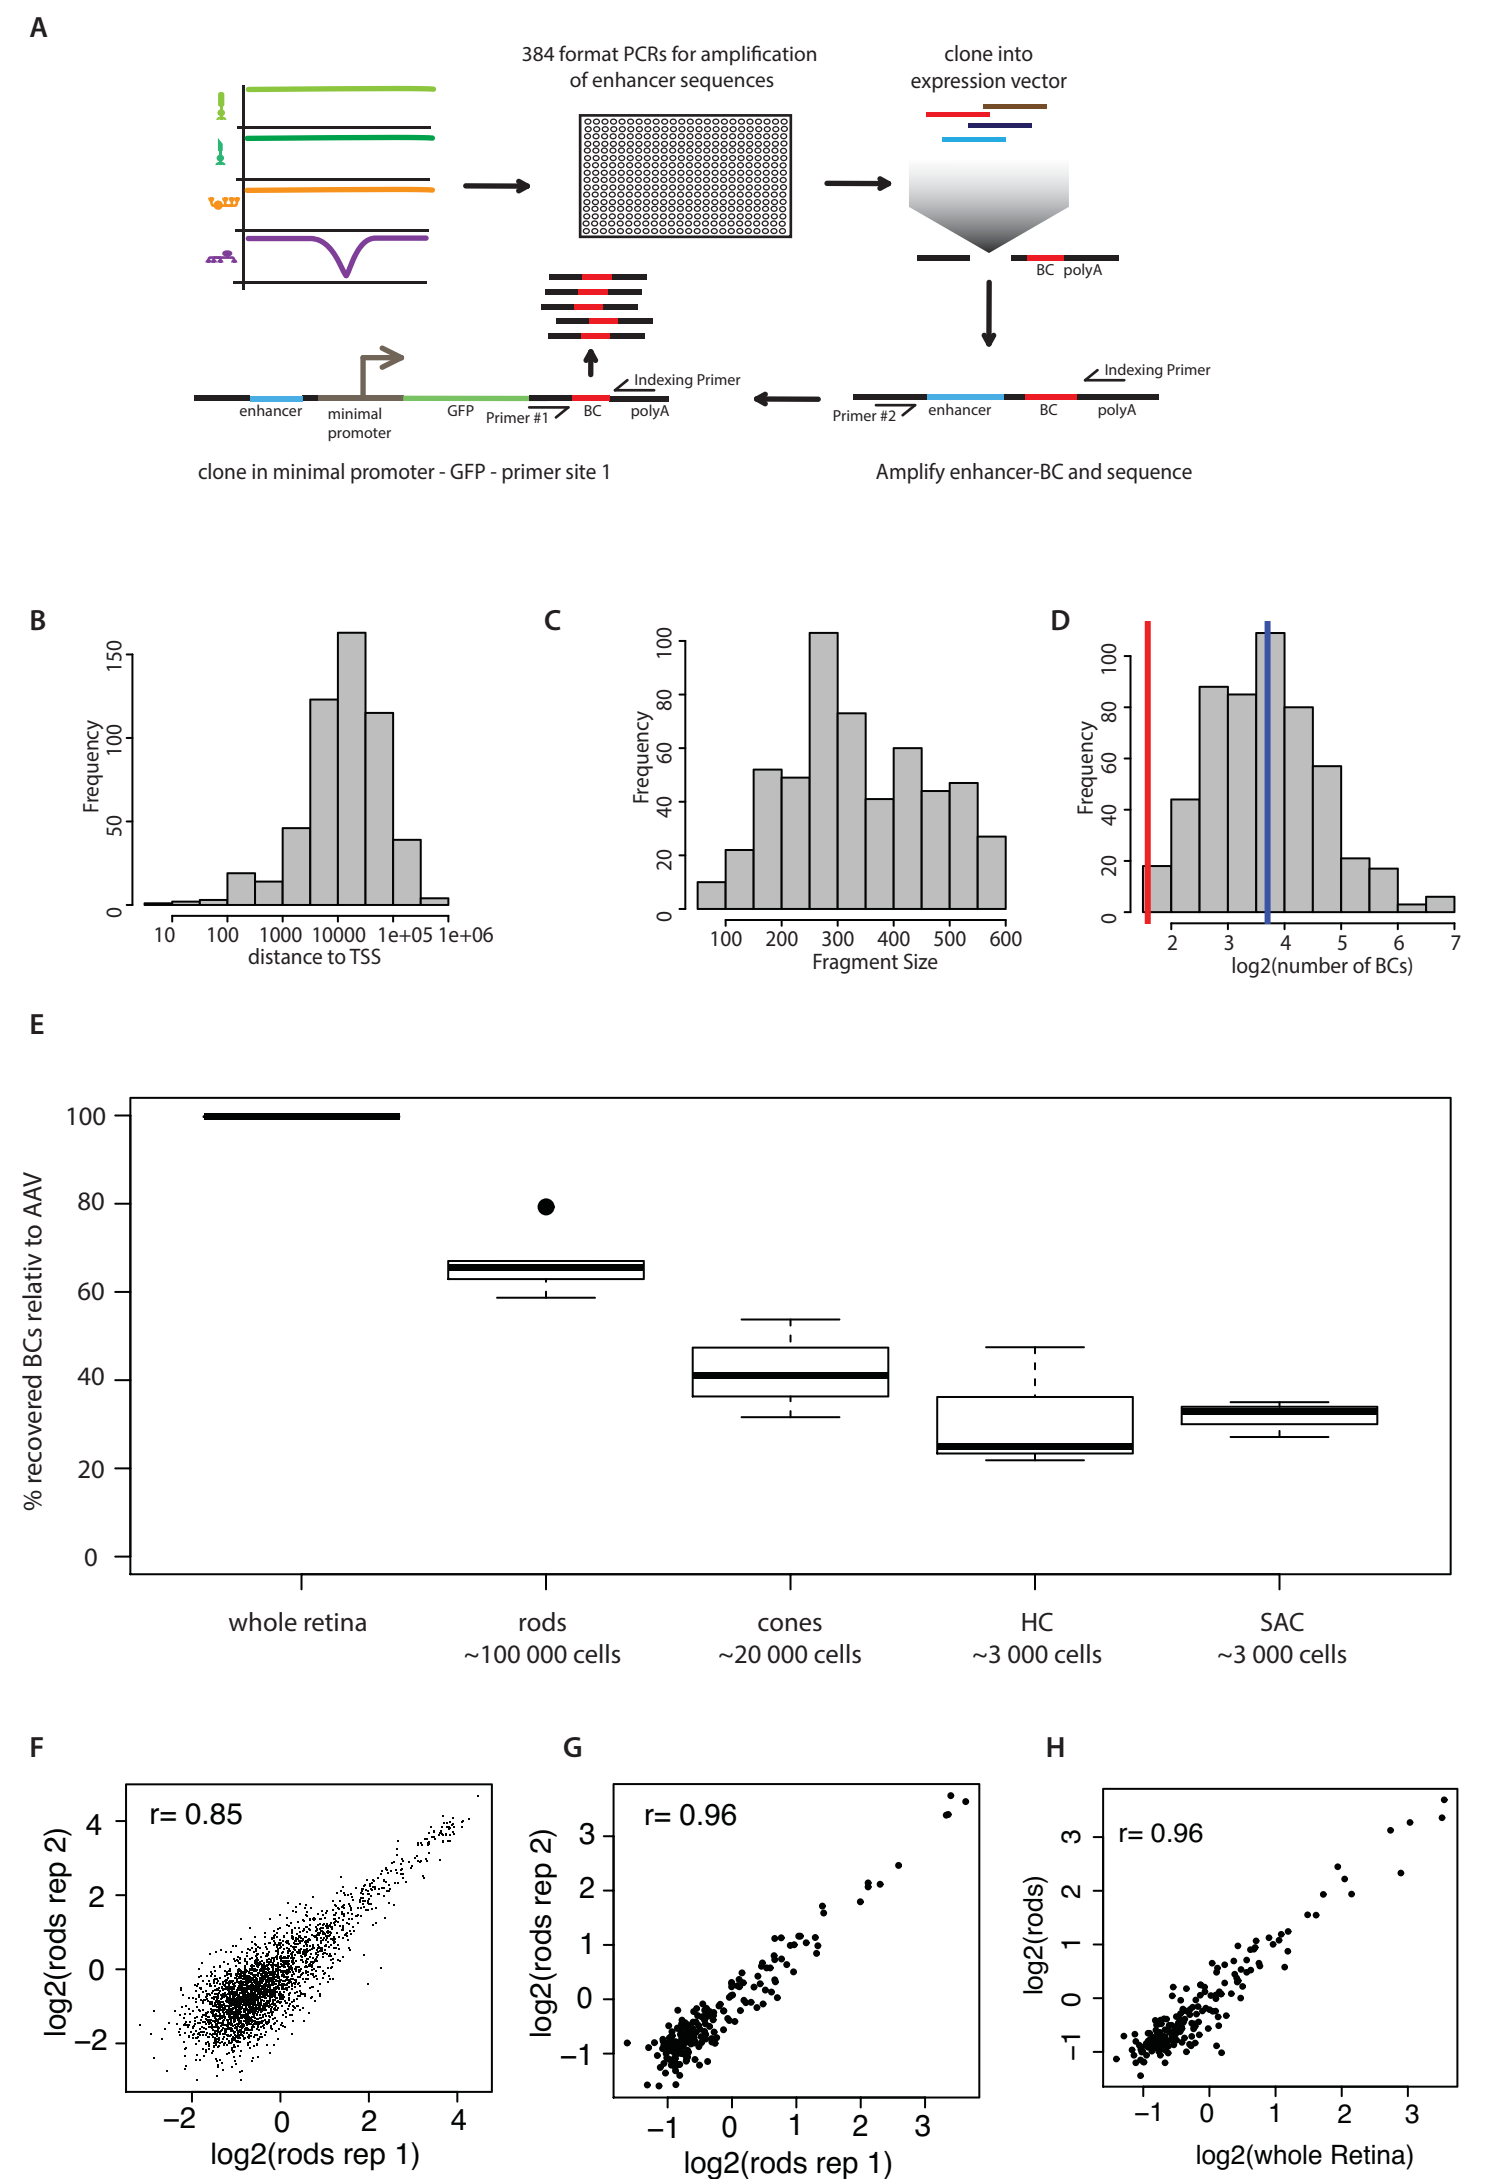

Supplementary figure 3:

(A) Experimental procedure used to construct the PRA libraries. Methylation maps informed on putative CREs, fragments were PCR amplified in 384-well format and pooled. Pooled fragments were cloned into a vector containing the expression cassette consisting of a multiple cloning site, a random 15bp barcode sequence and a polyA signaling sequence (pA). In order to average out the contribution of barcode specific biases to the signal we aimed for at least ten different barcodes per unique fragment. To link CREs to barcodes the CRE-barcode sequences were amplified using Primer #2 and one of the Indexing primers (Primers #3-11) containing the Illumina flow cell annealing sequences. PCR products were purified and sequenced. Next the vector was cut between the enhancer and BC and a sequence containing a 31bp minimal promoter, CpG free eGFP and the annealing sequence for Primer #1 was cloned in. Subsequently the construct was cut out of the cloning vector into the AAV vector for virus packaging. (Also see methods)

(B) Most tested putative CREs are located kilobases away from genes. Histogram displaying distance distribution of assayed CREs to nearest transcriptional start site. (C) The tested CREs are restricted in size, not exceeding 600bp. Histogram displaying size distribution of assayed CREs.

(D) Histogram displaying distribution of number of barcodes per CRE. The red line indicates cutoff for minimal number of Barcodes per CRE in the reporter assay (3 BCs), the blue line represents median BCs per CRE (13 BCs).

(E) Fraction of recovered barcodes scales the number of sampled cells and cell number tested. Boxplot displaying percentage of unique barcodes recovered in the different cell types relative to their representation in the AAV input for all cell types tested. Each box shows % recovered barcodes of all replicates for per cell type.

(F) PRA signal reproducibility at the level of barcodes in sorted rod photoreceptors. Reproducibility of barcode level activity is illustrated here by comparing two independent biological replicates.

(G) Using multiple barcodes to derive CRE activity levels enhance PRA accuracy. PRA signal reproducibility at the level of fragment in sorted rod photoreceptors. Activities of multiple barcodes (median ~13) is used to derive mean activity for each tested fragment to reducing the technical noise of the assay.

(H) The tested set of CRE shows very similar activity between rods and whole retina. Scatterplot comparing activity of CREs at the fragment level in whole Retina and rods.

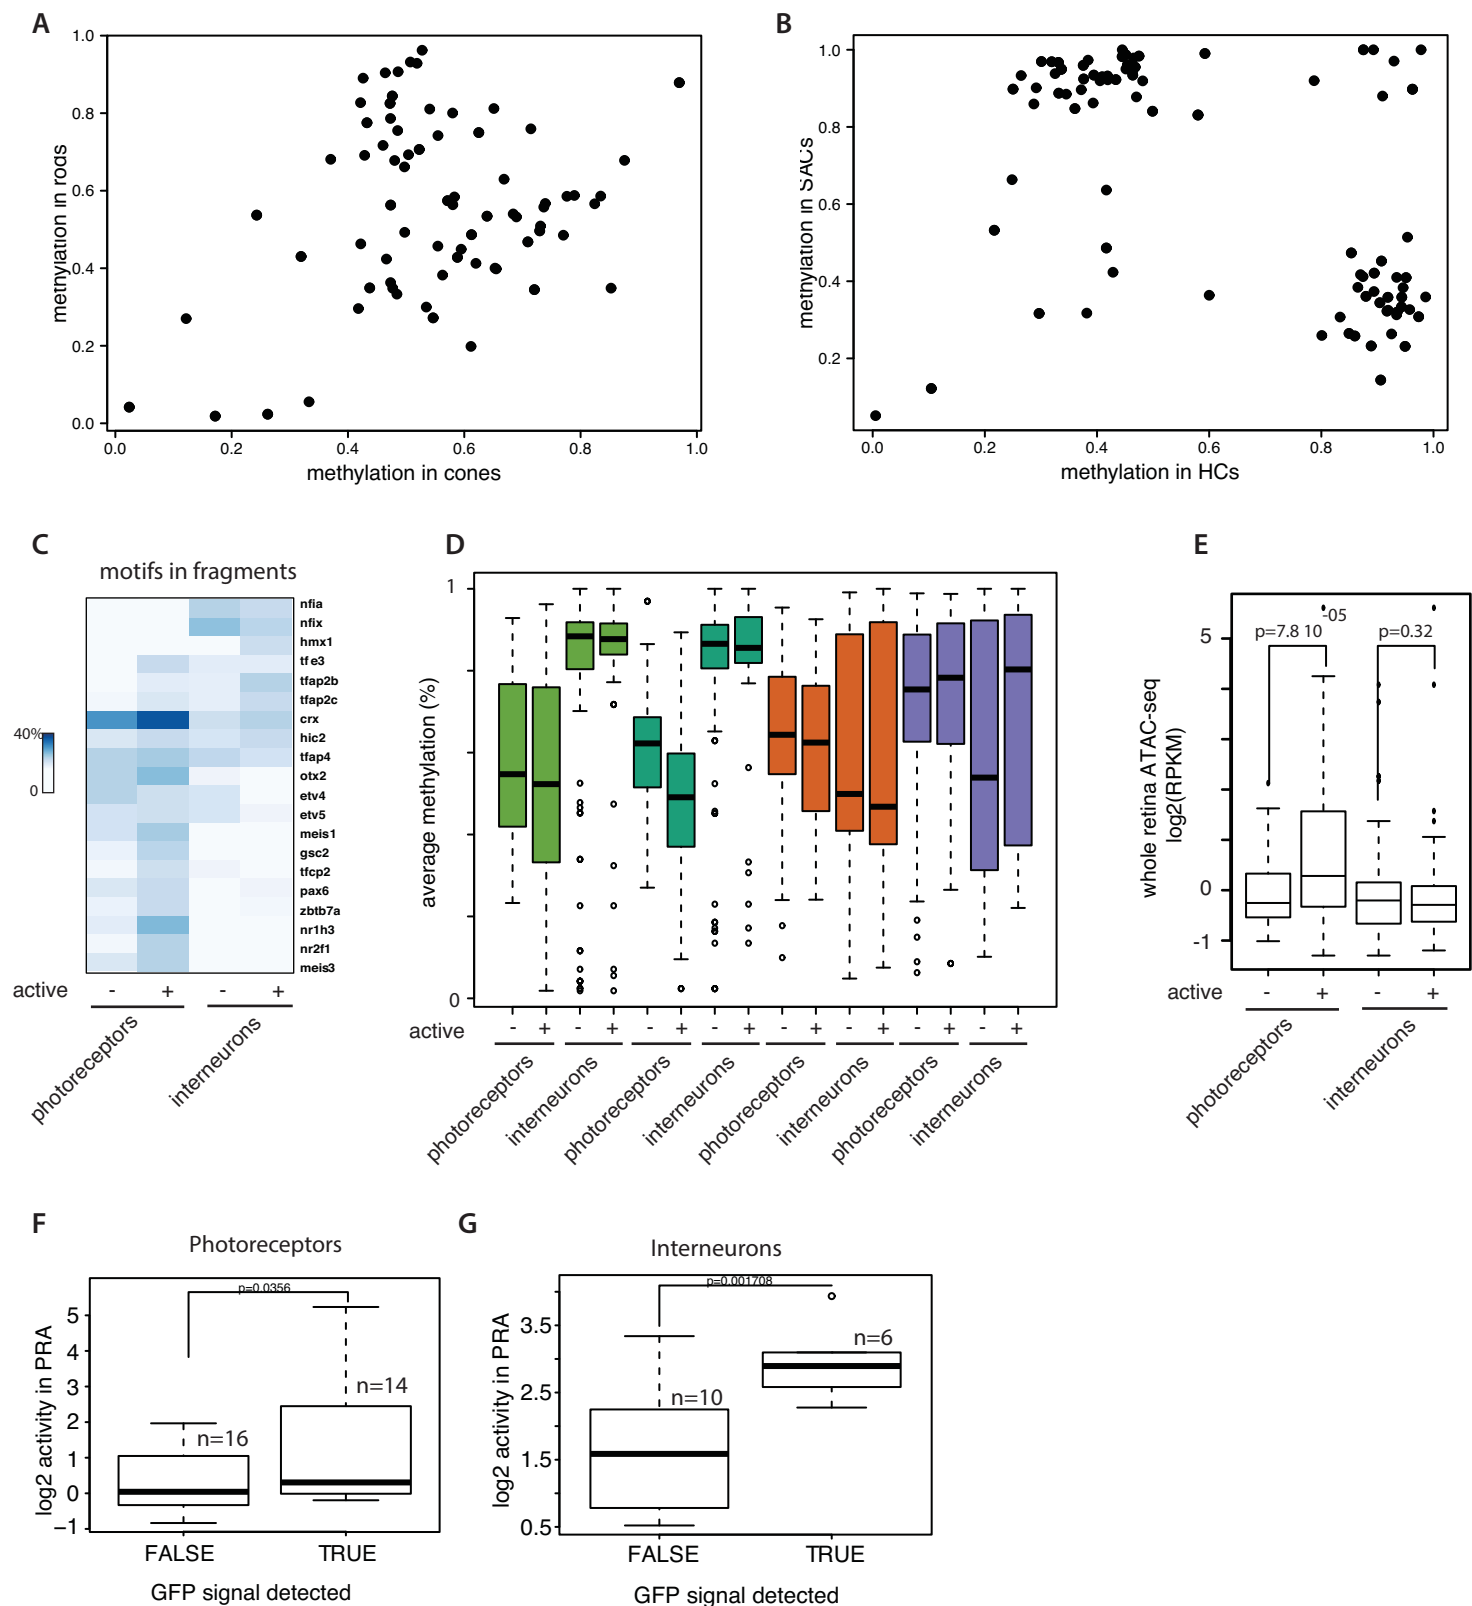

Supplementary figure 4:

(A-B) Scatterplot depicting the average methylation levels of the regions used to design the constructs in (A) library #2 and (B) library #3. Methylation is compared among photoreceptors or interneurons.

(C) Active fragments have slightly more TF binding sites than inactive ones. TF motifs enriched within fragments showing activity in photoreceptors or interneurons. Activity of a fragment was defined by PRA. Shown are motif occurrence frequencies in % for the indicated set of fragments after subtracting motif frequency in a background set of sequences. (D) Methylation levels of endogenous regions from which fragments originate are displayed as a function of their activity in the PRA. (E) Active fragments tend to have higher chromatin accessibility than inactive ones. Same as D but showing chromatin accessibility of endogenous regions relative to their activity in the PRA. ATAC-seq data from whole retina were used (Mo et al, 2016). p-values were derived using a bi-directional t-test.

(F-G) Single fragment validation results are in good agreement with PRA activity measures. Boxplot depicting comparing the PRA measured activity for fragments showing or not detectable Chrd2-GFP in (F) photoreceptors (G) interneurons. The fragments where Chr2-GFP is detected by immunostaining have significantly higher PRA activity in the respective cell type. P-value was calculated using an unidirectional t-test.

A

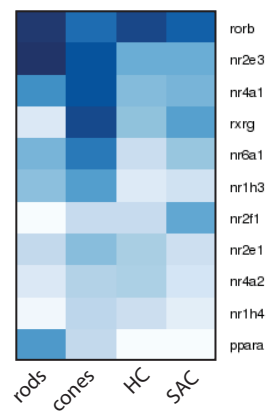

Supplementary figure 5:

(A) Repertoire of nuclear receptors expressed in the studied cell types. Heatmap representing RPKM for nuclear receptors expressed in at least one of the studied cell type. Heatmap was organized by hierarchical clustering.

| cell type                | mouse strain                                                                    |
|--------------------------|---------------------------------------------------------------------------------|
| rods                     | b2-Cre x B6.Cg-Gt(ROSA)26Sortm9(CAG-tdTomato)Hze/J # 007913                     |
| cones                    | d4-Cre x B6.Cg-Gt(ROSA)26Sortm9(CAG-tdTomato)Hze/J # 007911                     |
| horizontal cells         | B6Cf1-Tg(Gja10-Cre, #14)BR x B6.Cg-Gt(ROSA)26Sortm9(CAG-tdTomato)Hze/J # 007917 |
| starburst amacrine cells | 129S6-Chat_tm1(cre)Lowl/J x B6.Cg-Gt(ROSA)26Sortm9(CAG-tdTomato)Hze/J # 007921  |

**Supplementary Table 1:** Table of mouse strains used to FACS sort specific cell types from the whole retina (Siegert *et al*, 2009).

Hartl et al, Supplementary Table 2

| chromosome | start     | end       | strand | ID                | SACMeans   | HCMeans    | wholeMeans   | rodMeans_lib1 | coneMeans_lib2 | rodsMeans_lib2 | GFP signal detected in          | csPRA prediction |
|------------|-----------|-----------|--------|-------------------|------------|------------|--------------|---------------|----------------|----------------|---------------------------------|------------------|
| chr16      | 49817994  | 49818185  | -      | 144-/Intergenic2  | 0.1448962  | 0.7817183  | 4.1180784    | 3.130001537   | 3.193095825    | 2.777570411    | Photoreceptors                  | Photoreceptors   |
| chr17      | 48473681  | 48474023  | -      | 217-/Trem2-Intra  | NA         | NA         | NA           | 0.919568521   | NA             | NA             | Photoreceptors                  | Photoreceptors   |
| chr18      | 60942592  | 60942910  | +      | 218+              | 0.2246052  | 0.5558612  | 0.4719649    | 0.570810657   | 0.547496002    | -0.502445419   | negative                        | Photoreceptors   |
| chr4       | 153317537 | 153317650 | +      | 259+              | NA         | NA         | NA           | -0.922875571  | 0.086656356    | -0.962055755   | negative                        | Photoreceptors   |
| chr5       | 28472582  | 28472934  | -      | 128-/Intergenic1  | NA         | NA         | NA           | 2.447912426   | 1.585804797    | 1.486156309    | Photoreceptors                  | Photoreceptors   |
| chr7       | 20015162  | 20015346  | +      | 262+              | NA         | NA         | NA           | -0.834708042  | NA             | NA             | negative                        | negative         |
| chr9       | 108433361 | 108433572 | +      | 108+              | NA         | NA         | NA           | -0.234098952  | NA             | NA             | negative                        | negative         |
| chr9       | 64799176  | 64799667  | -      | 112-              | 1.3081915  | 0.6281876  | 5.2348589    | NA            | NA             | NA             | Photoreceptors                  | Photoreceptors   |
| chr9       | 98892095  | 98892355  | -      | 107-/Faim-Intra   | 0.5212305  | 0.4705372  | 4.0082861    | 3.694082443   | 3.106615399    | 3.071354462    | rods                            | Photoreceptors   |
| chr10      | 75067780  | 75068255  | +      | 524+              | NA         | NA         | NA           | NA            | 0.307958584    | -0.642933092   | Photoreceptors, HC, Mueller     | Photoreceptors   |
| chr10      | 95018573  | 95019092  | -      | 283-              | NA         | NA         | NA           | NA            | -0.195550916   | -0.778190793   | Photoreceptors                  | Photoreceptors   |
| chr14      | 68252390  | 68252858  | +      | 427+              | NA         | NA         | NA           | NA            | -0.320660988   | -0.740342556   | Photoreceptors, Mueller         | negative         |
| chr1       | 64399627  | 64400178  | -      | 483-              | NA         | NA         | NA           | NA            | 0.278933508    | -1.073349105   | Photoreceptors, Mueller         | Photoreceptors   |
| chr3       | 30669079  | 30669564  | +      | 360+              | NA         | NA         | NA           | NA            | 0.219970671    | -0.8625043     | Photoreceptors, Mueller         | Photoreceptors   |
| chr3       | 57348332  | 57348893  | +      | 506+              | NA         | NA         | NA           | NA            | -0.012080873   | -0.650201155   | Photoreceptors, Mueller         | Photoreceptors   |
| chr5       | 53662011  | 53662512  | -      | 357-              | NA         | NA         | NA           | NA            | -0.161178677   | -0.582074305   | Photoreceptors, Mueller         | Photoreceptors   |
| chr7       | 87193812  | 87194240  | -      | 330-              | NA         | NA         | NA           | NA            | -0.060127345   | -1.13118179    | Photoreceptors, Mueller         | Photoreceptors   |
| chr8       | 49596516  | 49597041  | +      | 359+              | NA         | NA         | NA           | NA            | 0.302115742    | -0.739830871   | Photoreceptors, ganglion cells  | Photoreceptors   |
| chr10      | 114602962 | 114603205 | -      | 3274-             | 0.57325865 | 2.24826702 | -0.342795558 | NA            | NA             | NA             | Mueller                         | Interneurons     |
| chr12      | 75335993  | 75336295  | +      | 3285+             | 3.33951396 | 2.82205884 | 1.1984568    | NA            | NA             | NA             | negative                        | Interneurons     |
| chr1       | 38455370  | 38455657  | -      | 3192-             | 2.5687756  | 2.73769384 | 0.900204402  | NA            | NA             | NA             | Mueller, Glia cells             | Interneurons     |
| chr3       | 131727036 | 131727461 | +      | 3010+             | 1.65020139 | 0.56919204 | -0.658386556 | NA            | NA             | NA             | ganglion cells                  | negative         |
| chr4       | 100706634 | 100706916 | -      | 3046-             | 1.55601072 | 1.34055942 | -0.000979624 | NA            | NA             | NA             | negative                        | negative         |
| chr4       | 103956384 | 103956713 | -      | 3215-             | 2.99481611 | 2.69555303 | 1.342116548  | NA            | NA             | NA             | Mueller + HC                    | Interneurons     |
| chr4       | 130912296 | 130912598 | -      | 3024-/Intergenic4 | 3.09691086 | 3.01884932 | 1.965822194  | NA            | NA             | NA             | HC + Amacrine cells             | Interneurons     |
| chr4       | 40994591  | 40995016  | -      | 3326-/Aqp7-Intra  | 2.09420918 | 2.58195659 | 0.293942264  | NA            | NA             | NA             | Amacrine cells + HC + Mueller   | Interneurons     |
| chr6       | 127582881 | 127583163 | -      | 3009-             | 1.61731687 | 0.31911029 | -0.614659127 | NA            | NA             | NA             | negative                        | negative         |
| chr6       | 48361745  | 48362148  | +      | 3149+             | 3.93440563 | 3.79679328 | 1.521460404  | NA            | NA             | NA             | Amacrine cells                  | Interneurons     |
| chr9       | 31656883  | 31657191  | -      | 3259-             | 2.75159521 | 2.79424503 | 1.151503338  | NA            | NA             | NA             | Amacrine cells + Photoreceptors | Interneurons     |
| chr9       | 50142608  | 50142868  | +      | 3260+             | 1.48726742 | 2.2763465  | -0.191911937 | NA            | NA             | NA             | HC                              | Interneurons     |

**Supplementary Table 2:** Table of individually tested enhancers and their activity pattern in the whole retina and log2 activity in csPRA. Second last column shows in which cell types GFP signal was detected under the microscope when single CREs were tested. 'negative' means no GFP signal could be found. The last column shows in which cell type CREs are expected to be active in csPRA. 'negative' means that activity is below threshold in csPRA.

**Sequences of mutated CREs:**

>107\_WT  
GAGGCTTTCAC TGACCTTTCCATGTACGAGACTAGCCCCGCCAGAGTGCTGTCTGGGATTAAGTGTACAGTCT  
TAATTGTATTAGTATTTAGGTGACTTTGGGATTATTAGACTATTCTGTGCATAGCTGCCTCTTGAGGGGAGAGC  
CGGGAGAGAGAAGCAGCTGCATGTGCTGTGAGTAGGACATCTGGGGGCATCACTTTACCATCTCATAGTTCTA  
GGGCCCTTGAAAACCTGGTATTGTCATGCTGGAAGGGT

>107\_all\_MEIS1\_mut  
GAGGCTTTCAC TGACCTTTCCATGTACGAGACTAGCCCCGCCAGAGTGCTGTCTGGGATTAAGTGTACAGTCT  
TAATTGTATTAGTATTTAGGTGACTTTGGGATTATTAGACTATTCTGTGCATAGCTGCCTCTTGAGGGGAGAGC  
CGGGAGAGAGAAGCAGCTGCATGTGCTGTGAGTAGGACATCTGGGGGCATCACTTTACCATCTCATAGTTCTA  
GGGCCCTTGAAAACCTGGTCTTAGTTGCTGGAAGGGT

>107\_all\_SP1\_mut  
GAGGCTTTCAC TGACCTTTCCATGTACGAGACTAAGGTAGTACAGAGTGCTGTCTGGGATTAAGTGTACAGTC  
TTAATTGTATTAGTATTTAGGTGACTTTGGGATTATTAGACTATTCTGTGCATAGCTGCCTCTTGAGGGGAGAG  
CCGGGAGAGAGAAGCAGCTGCATGTGCTGTGAGTAGGACATCTGGGGGCATCACTTTACCATCTCATAGTTCT  
AGGGCCCTTGAAAACCTGGTATTGTCATGCTGGAAGGGT

>107\_all\_ID4\_mut  
GAGGCTTTCAC TGACCTTTCCATGTACGAGACTAGCCCCGCCAGAGTGCTGTCTGGGATTAAGTGTTCAGTCTT  
AATTGTATTAGTATTTAGGTGACTTTGGGATTATTAGACTATTCTGTGCATAGCTGCCTCTTGAGGGGAGAGCC  
GGGAGAGAGACGCGATAGCATGTGCTGTGAGTAGGACATCTGGGGGCATCACTTTACCATCTCATAGTTCTAG  
GGCCCTTGAAAACCTGGTATTGTCATGCTGGAAGGGT

>107\_all\_Nr1h3\_mut  
GAGGCTTTCATTACAATTTCCATGTACGAGACTAGCCCCGCCAGAGTGCTGTCTGGGATTAAGTGTACAGTCT  
TAATTGTATTAGTATTTAGGTGACTTTGGGATTATTAGACTATTCTGTGCATAGCTGCCTCTTGAGGGGAGAGC  
CGGGAGAGAGAAGCAGCTGCATGTGCTGTGAGTAGGACATCTGGGGGCATCACTTTACCATCTCATAGTTCTA  
GGGCCCTTGAAAACCTGGTATTGTCATGCTGGAAGGGT

>483\_WT  
CGGGGCAGGAGTGAGTCATTACACAGAGGCGGGTCAGAGAGTAGTGGTCACTCTTCAGCTTACAGCTCTCTC  
TAGTCCTCTATCCAGACTCTAGTTTCATGAACTTTGTAGTTAGACATTTTTCTAGTGAATATTTATTACCCCCAC  
TGTAATCCTTCATTTAACATAATATAAAATTTGTGGAAAGGGAGAGTAATTAGTAATAAATCATCATCTCATCCA  
TTAGCAGTAAATAATGCCACTTTATCAAAGTCACAGCCATCGAACAGGCGGCTAGAGGTGGTTATGTATGCCAC  
CCGACTGGAAGCAGGCCAAAAGCAAACCGCAGCCCCGTTTATTATCCTAATTATGCCCTAATACGATGCCATC  
TTTTTCTCCTATAAACTTGATGACAATAAAAGGGTAACAATGAAAATTGGCAGGGTAAGTGAGCAAGGAAGAT  
AGGCTGGGAAACCACTAGCCCCACCGGCTACCA  
GCCTGAGTCCTGAGGCTGAAAGGGCTGAAAACCCCATGGGAATGAAATGGAGCAGGGGACTCAAGTGGTTGG

>483\_all\_MEIS1\_mut  
CGGGGCAGGAGTGAGTCATTACACAGAGGCGGGTCAGAGAGTAGTGGTCACTCTTCAGCTTACAGCTCTCTC  
TAGTCCTCTATCCAGACTCTAGTTTCATGAACTTTGTAGTTAGACATTTTTCTAGTGAATATTTATTACCCCCAC  
TGTTCTAGTTCATTTAACATAATATAAAATTTGTGGAAAGGGAGAGTAATTAGTAATAAATCATCATCTCATCCA  
TTAGCAGTAAATAATGCCACTTTATCAAAGTCACAGCCATCGAACAGGCGGCTAGAGGTGGTTATGTATGCCAC  
CCGACTGGAAGCAGGCCAAAAGCAAACCGCAGCCCCGTTTATTATCCTAATTATGCCCTAATACGATGCCATC  
TTTTTCTCCTATAAACTTGATGACAATAAAAGGGTAACAATGAAAATTGGCAGGGTAAGTGAGCAAGGAAGAT  
AGGCTGGGAAACCACTAGCCCCACCGGCTACCA  
GCCTGAGTCCTGAGGCTGAAAGGGCTGAAAACCCCATGGGAATGAAATGGAGCAGGGGACTCAAGTGGTTGG

>483\_all\_CRX\_mut  
CGGGGCAGGAGTGAGTCATTACACAGAGGCGGGTCAGAGAGTAGTGGTCACTCTTCAGCTTACAGCTCTCTC  
TAGTCCTCTATCCAGACTCTAGTTTCATGAACTTTGTAGTTAGACATTTTTCTAGTGAATATTTATTACCCCCAC  
TGTAATCCTTCATTTAACATAATATAAAATTTGTGGAAAGGGAGAGTAATTAGTAATAAATCATCATCTCATCCA  
TTAGCAGTAAATAATGCCACTTTATCAAAGTCACAGCCATCGAACAGGCGGCTAGAGGTGGTTATGTATGCCAC  
CCGACTGGAAGCAGGCCAAAAGCAAACCGCAGCCCCGTTTATTATCCTAATTATGCCCTAATACGATGCCATC  
TTTTTCTCCTATAAACTTGAGGTGTTAAAAGGGTAACAATGAAAATTGGCAGGGTAAGTGAGCAAGGAAGAT  
AGGCTGGGAAACCACTAGCCCCACCGGCTACCA  
GCCTGAGTCCTGAGGCTGAAAGGGCTGAAAACCCCATGGGAATGAAATGGAGCAGGGGACTCAAGTGGTTGG

>483\_all\_NRL\_mut



CGGGGCAGGAGTGAGTCATTACACAGAGGCGGGTCAGAGAGTAGTGGTCACTCTTCAGCTTACAGCTCTCTC  
TAGTCCTCTATCCAGACTCTAGTTTCATGAACTTTGTAGTTAGACATTTTTCCTAGTGAATATTTATTACCCCCAC  
TGTAAGCGAACGTAGAACATAATATAAAATTTGTGGAAAGGGAGAGTAATTAGTAATAAATCATCATCTCATCC  
ATTAGCAGTAAATAATGCCACTTTATCAAAGTCACAGCCATCGAACAGGCGGCTAGAGGTGGTTATGTATGCCA  
CCCGACTGGAAGCAGGCCAAAAGCAAACCGCAGCCCCCGTTTATTATCCTAATTATGCCCTAATACGATGCCAT  
CTTTTCTCCTATAAACTTGATGACAATAAAAGGGTAACAATGAAAATTGGCAGGGTAAGTGAGCAAGGAAGA  
TAGGCTGGGAAACCACCTAGCCCCACCGGCTACCA  
GCCTGAGTCCTGAGGCTGAAAGGGCTGAAAACCCCATGGGAATGAAATGGAGCAGGGGACTCAAGTGGTTGG  
>483\_all\_En2\_mut  
CGGGGCAGGAGTGAGTCATTACACAGAGGCGGGTCAGAGAGTAGTGGTCACTCTTCAGCTTACAGCTCTCTC  
TAGTCCTCTATCCAGACTCTAGTTTCATGAACTTTGTAGTTAGACATTTTTCCTAGTGAATATTTATTACCCCCAC  
TGTAATCCTTCATTTAACATAATATAAAATTTGTGGAAAGGGAGAGCGGAGTAAACTAAATCATCATCTCATCCA  
TTAGCAGTAAATAATGCCACTTTATCAAAGTCACAGCCATCGAACAGGCGGCTAGAGGTGGTTATGTATGCCAC  
CCGACTGGAAGCAGGCCAAAAGCAAACCGCAGCCCCCGTTTATTATCCCGAGTAAACCTAATACGATGCCATC  
TTTTTCTCCTATAAACTTGATGACAATAAAAGGGTAACAATGAAAATTGGCAGGGTAAGTGAGCAAGGAAGAT  
AGGCTGGGAAACCACCTAGCCCCACCGGCTACCA  
GCCTGAGTCCTGAGGCTGAAAGGGCTGAAAACCCCATGGGAATGAAATGGAGCAGGGGACTCAAGTGGTTGG

Primers used for csPRA library preparation:

| Name      | Sequence                                                                           |
|-----------|------------------------------------------------------------------------------------|
| Primer #1 | AATGATACGGCGACCACCGAGATCTACACTCTTTCCTACACGACGCTCTTCCGATCT                          |
| Primer #2 | AATGATACGGCGACCACCGAGATCTACACTCTTTCCTACACGACGCTCTTCCGATCTTCCACTGGGAGAAGAGGAAGTCAAA |

Indexing Primers:

| Name       | Sequence                                                         | Index |
|------------|------------------------------------------------------------------|-------|
| Primer #3  | CAAGCAGAAGACGGCATACGAGATCGTGATGTGACTGGAGTTCAGACGTGTGCTCTTCCGATCT | 1     |
| Primer #4  | CAAGCAGAAGACGGCATACGAGATACATCGGTGACTGGAGTTCAGACGTGTGCTCTTCCGATCT | 2     |
| Primer #5  | CAAGCAGAAGACGGCATACGAGATATTGGCGTGACTGGAGTTCAGACGTGTGCTCTTCCGATCT | 6     |
| Primer #6  | CAAGCAGAAGACGGCATACGAGATTACAAGGTGACTGGAGTTCAGACGTGTGCTCTTCCGATCT | 12    |
| Primer #7  | CAAGCAGAAGACGGCATACGAGATTGGTCAGTGACTGGAGTTCAGACGTGTGCTCTTCCGATCT | 4     |
| Primer #8  | CAAGCAGAAGACGGCATACGAGATGATCTGGTGACTGGAGTTCAGACGTGTGCTCTTCCGATCT | 7     |
| Primer #9  | CAAGCAGAAGACGGCATACGAGATGACTGTGTGACTGGAGTTCAGACGTGTGCTCTTCCGATCT | 5     |
| Primer #10 | CAAGCAGAAGACGGCATACGAGATTCAAGTGTGACTGGAGTTCAGACGTGTGCTCTTCCGATCT | 8     |
| Primer #11 | CAAGCAGAAGACGGCATACGAGATGTGATCGTGACTGGAGTTCAGACGTGTGCTCTTCCGATCT | 9     |

### References:

1. Siegert, S. *et al.* Genetic address book for retinal cell types. *Nat. Neurosci.* **12**, 1197–1204 (2009).
2. Siegert, S. *et al.* Transcriptional code and disease map for adult retinal cell types. *Nat. Neurosci.* **15**, 487–95, S1-2 (2012).
3. Mo, A. *et al.* Epigenomic landscapes of retinal rods and cones. *Elife* **5**, 1–29 (2016).
4. Mo, A. *et al.* Epigenomic Signatures of Neuronal Diversity in the Mammalian Brain. *Neuron* **86**, 1369–1384 (2015).
